# Supplementary material for: Anopheles gambiae PGRPLC-Mediated Defense against Bacteria Modulates Infections with Malaria Parasites
Source: PubMed Central journal article supplement (PMC2715215; doi:10.1371/journal.ppat.1000542), 2009-08-07
Supplement: ppat.1000542.s002.pdf [file ppat.1000542.s002.pdf]

**Table S1. Oligonucleotide primers used in PCR and RT-PCR reactions**

| Gene Name or PGRPLC primer      | Forward (F) or Reverse (R) | Sequence                                      | Product size or location info |
|---------------------------------|----------------------------|-----------------------------------------------|-------------------------------|
| <i>PGRPS1</i>                   | F                          | GGACGAGCCGGCCAGGAATC                          | 493 bp                        |
|                                 | R                          | CAGCTTCGCGTACAGATAC                           |                               |
| <i>PGRPLD</i>                   | F                          | GACTCGGAGGATTGTCTGGA                          | 281 bp                        |
|                                 | R                          | CGGATCGACTCGGTGATAAA                          |                               |
| <i>PGRPLB</i>                   | F                          | CCATCCCGTACGTCATCATA                          | 274 bp                        |
|                                 | R                          | ATGTTCTTCGGTGGCAAATC                          |                               |
| <i>PGRPLA1</i>                  | F                          | CCGACATTCCAAGCAACTTT                          | 280 bp                        |
|                                 | R                          | ACCAGCCTAGCGTACAGCAT                          |                               |
| <i>PGRPLA2</i>                  | F                          | TGCTGATAACGCACATAGGC                          | 124 bp                        |
|                                 | R                          | TTGCTCGGTATGTCTTGCAG                          |                               |
| <i>PGRPS2&amp;3</i>             | F                          | ACAACCTCCTGGTCGGTGAG                          |                               |
| <i>PGRPS2</i>                   | R                          | TCACCTGTCACAATGGTCGT                          | 533 bp                        |
| <i>PGRPS3</i>                   | R                          | CCCCACATTAAGCTACGTTTC                         | 423 bp                        |
| <i>PGRPLC1</i>                  | F                          | AAAGTTGGAGCCCACACCAAA                         | 234 bp                        |
|                                 | R                          | CAAAAGCCTCAGCTGTTC                            |                               |
| <i>PGRPLC2</i>                  | F                          | ACCATTCCCGGTTACAATTC                          | 273 bp                        |
|                                 | R                          | CTCGTGATCGGGGCGCTCGTC                         |                               |
| <i>PGRPLC3</i>                  | F                          | AAAGGGTTCAACGTGGACAGC                         | 282 bp                        |
|                                 | R                          | TCGTCGGTTTGTGGTGTTCGTT                        |                               |
| <i>PGRPLC</i> ; qRT-PCR primers | F                          | CCGGTTAATAACGTCATCATTGC                       |                               |
|                                 | R                          | TCACCGTAGTTGGTGTGGTT                          | 119 bp                        |
|                                 | R                          | CGTCGTAGTTTTTGCCATCC                          | 118 bp                        |
|                                 | R                          | TCGGGACTCGAATGAAACTC                          | 107 bp                        |
| <i>S7</i>                       | F                          | GTGCGCGAGTTGGAGAAGA                           | 78 bp                         |
|                                 | R                          | ATCGGTTTGGGCAGAATGC                           |                               |
| <i>GFP</i>                      | F                          | TAATACGACTCACTATAGGGCAAGACACGTG<br>CTGAAGTCAA | ~450 bp                       |

|                                  | R | TAATACGACTCACTATAGGGGCCTGAATTTA<br>ACCAGGAACC |                                       |
|----------------------------------|---|-----------------------------------------------|---------------------------------------|
| <i>BSF340/19 &amp; BSF806/26</i> | F | TCCTACGGGAGGCAGCAGT                           |                                       |
|                                  | R | GGACTACCAGGGTATCTAATCCTGTT                    |                                       |
| <i>CECI</i>                      | F | ACCAACCAACCACCAAACAAC                         | 168 bp                                |
|                                  | R | CTTCTCTGCTGCCTTGAACACT                        |                                       |
| <i>DEF1</i>                      | F | GCCTTTGTGCCGCTCACT                            | 61bp                                  |
|                                  | R | GCCTTACTGTTGCAGTAACCACC                       |                                       |
| 1                                | F | AGGAACCTACAGCTAGAAAATG                        | 2 <sup>nd</sup> exon                  |
| 2                                | F | GTTAAGGTTGCCGTGGAAGC                          | 2 <sup>nd</sup> exon                  |
| 3                                | F | CAACTCGTCGGACATCACGTT                         | 2 <sup>nd</sup> exon                  |
| 4                                | R | ACCTGCCCTTGATGTACGTT                          | 2 <sup>nd</sup> exon                  |
| 5                                | R | ATCCTGGTAAATGTTCTTTATCAC                      | 2 <sup>nd</sup> exon                  |
| 6                                | F | CACGCACCTGGCAATCTAGTCT                        | 3 <sup>rd</sup> exon                  |
| 7                                | F | AACCCTTGATCAGCTTTATCG                         | 3 <sup>rd</sup> exon                  |
| 8                                | R | TGGCACACAGGACAATCATCA                         | 3 <sup>rd</sup> exon                  |
| 9                                | R | GGATCGATATGACCGCTACAA                         | 3 <sup>rd</sup> exon                  |
| 10                               | F | CCAGATCCGAGACCGTTACGG                         | 4 <sup>th</sup> exon                  |
| 11                               | F | AGACCGTTACGGTTAGTGACG                         | 4 <sup>th</sup> exon                  |
| 12                               | F | CCGGTTAATAACGTCATCATTGC                       | 4 <sup>th</sup> exon                  |
| 13                               | R | GTGGCAGTGTGAGCAATGA                           | 4 <sup>th</sup> exon                  |
| 14                               | R | ACGGCATGCGGCCTGAG                             | 4 <sup>th</sup> /5 <sup>th</sup> exon |
| 15                               | R | TGCTTTGCATGCTTGCTGA                           | 4 <sup>th</sup> /5 <sup>th</sup> exon |
| 16                               | R | TACCTGATACATGCATTTTCGTCTGA                    | 4 <sup>th</sup> /5 <sup>th</sup> exon |
| 17                               | F | CACAAAACACTTCTGACCTCTCC                       | 4 <sup>th</sup> intron                |
| 18                               | F | TCTGACCTCTCCCATGCAG                           | 4 <sup>th</sup> intron                |
| 19                               | F | AAACCACACCAACTACGGTGA                         | 5 <sup>th</sup> exon                  |
| 20                               | R | TCACCGTAGTTGGTGTGGTT                          | 5 <sup>th</sup> exon                  |
| 21                               | F | ACAACTTTTGATCGGTGGTG                          | 5 <sup>th</sup> exon                  |
| 22                               | F | AAAGTTGGAGCCCACACCAAA                         | 5 <sup>th</sup> exon                  |

|    |   |                         |                                        |
|----|---|-------------------------|----------------------------------------|
| 23 | F | GCTTGCCAAGGAGTACAAGC    | 6 <sup>th</sup> exon                   |
| 24 | R | CAAAAGCCTCAGCTGTTC      | 6 <sup>th</sup> exon                   |
| 25 | R | AATGTGGCAAAGCCTCAG      | 6 <sup>th</sup> exon                   |
| 26 | R | AAATGTGGCAAAGCCTCAG     | 6 <sup>th</sup> exon                   |
| 27 | R | AAAATGTGGCAAAGCCTCA     | 6 <sup>th</sup> exon                   |
| 28 | F | GGGTGCGCTTAATTCAGGA     | 7 <sup>th</sup> exon                   |
| 29 | F | ATGGATGGCAAAAACCTACGAC  | 7 <sup>th</sup> exon                   |
| 30 | R | CGTCGTAGTTTTTGCCATCC    | 7 <sup>th</sup> exon                   |
| 31 | F | ACCATTCCCGGTTACAATTC    | 7 <sup>th</sup> /8 <sup>th</sup> exon  |
| 32 | R | CTCCGAGGCATATATTCGGTA   | 8 <sup>th</sup> exon                   |
| 33 | R | CAGTGCTTCGATTAGCCACTT   | 8 <sup>th</sup> exon                   |
| 34 | R | CAAGCTGTGCAGTGCTTCGAT   | 8 <sup>th</sup> exon                   |
| 35 | R | AAACTGGGGCAAGCTGTGCAG   | 8 <sup>th</sup> exon                   |
| 36 | R | CTCGTGATCGGGGCGCTCGTC   | 8 <sup>th</sup> exon                   |
| 37 | R | TCGGGACTCGAATGAAACTC    | 9 <sup>th</sup> exon                   |
| 38 | F | TTTAGCGACATTGCGTATCA    | 9 <sup>th</sup> exon                   |
| 39 | F | AAAGGGTTCAACGTGGACAGC   | 9 <sup>th</sup> /10 <sup>th</sup> exon |
| 40 | R | CCAGTGGGGCCAAGTTTTGATG  | 10 <sup>th</sup> exon                  |
| 41 | R | TCGTCGGTTTTGTGGTGTGCGTT | 10 <sup>th</sup> exon                  |
| 42 | R | GGAAGTCATCAAGGACACTTGG  | 3' UTR                                 |
| 43 | R | GGTTCTCTTTTTCCGGTTCA    | 3' UTR                                 |
