# Supplementary material for: Anopheles gambiae PGRPLC-Mediated Defense against Bacteria Modulates Infections with Malaria Parasites
Source: PubMed Central journal article supplement (PMC2715215; doi:10.1371/journal.ppat.1000542), 2009-08-07
Supplement: ppat.1000542.s003.pdf [file ppat.1000542.s003.pdf]

**Table S2. Interactions in AgPGRPLC1-MTP/TCT model structures***Hydrogen bonds*

| PGRPLC1 atoms |     | Atoms of MTP |                      | PGRPLC1 atoms |     | Atoms of TCT |                      |
|---------------|-----|--------------|----------------------|---------------|-----|--------------|----------------------|
| H57           | Nε2 | AMU          | O7                   | H34           | Nε2 | GlcNAc       | O7                   |
| T149          | Oγ1 |              | O4 (W5) <sup>1</sup> | T149          | Oγ1 |              | O5 (W5) <sup>1</sup> |
| T35           | O   |              | N2                   | Y56           | Oη  |              | O6 (anh)             |
| Y68           | Oη  | L-Ala        | O10                  | I150          | N   |              | O3                   |
| H90           | O   | D-isoGln     | N                    | T35           | O   | MurNAc       | N2                   |
| K92           | N   |              | O                    | H57           | Nε2 |              | O7                   |
| N95           | Nδ2 |              | Oε1                  | Y68           | Oη  |              | O10                  |
| N95           | Nδ2 | Lys          | O                    | H90           | O   | D-Glu        | N                    |
| G88           | O   |              | O (W22) <sup>1</sup> | K147          | Nζ  |              | Oε1                  |
|               |     |              |                      | K92           | N   |              | Oε1                  |
|               |     |              |                      | N95           | Nδ2 |              | Oδ                   |
|               |     |              |                      | R82           | Nη1 | Meso-DAP     | Oζ1                  |
|               |     |              |                      |               | Nη2 |              | Oζ2                  |
|               |     |              |                      | G64           | N   |              | Oζ2                  |
|               |     |              |                      | G88           | O   | D-Ala        | N (W22) <sup>1</sup> |
|               |     |              |                      | N93           | N   |              | O                    |

*Hydrophobic contacts*

| PGRPLC1 residues |  | Atoms of MTP |     | PGRPLC1 residues |  | Atoms of TCT |     |
|------------------|--|--------------|-----|------------------|--|--------------|-----|
| T35              |  | AMU          | C8  | A36              |  | GlcNAc       | C8  |
| S151             |  |              | C11 | I150             |  |              | C8  |
| K147             |  | D-isoGln     | C   |                  |  |              | C7  |
| K92              |  |              | Cβ  | H34              |  |              | C8  |
| A89              |  | Lys          | Cα  | S151             |  | MurNAc       | C11 |
|                  |  |              | Cδ  | H57              |  | L-Ala        | Cβ  |
| Y63              |  |              | Cβ  | K147             |  | D-Glu        | Cε  |
|                  |  |              | Cγ  | H90              |  |              | Cβ  |
|                  |  |              | Cδ  | A89              |  |              | Cδ  |
|                  |  |              | Cε  | Y63              |  | Meso-DAP     | Cβ  |
|                  |  |              |     |                  |  |              | Cδ  |
|                  |  |              |     | A89              |  |              | Cβ  |
|                  |  |              |     |                  |  |              | Cα  |
|                  |  |              |     | K92              |  | D-Ala        | Cα  |
|                  |  |              |     |                  |  |              | C   |

<sup>1</sup>Structural water molecules observed in *DmPGRP-LCx-TCT-LCa* structure
