# Supplementary material for: Anopheles gambiae PGRPLC-Mediated Defense against Bacteria Modulates Infections with Malaria Parasites
Source: PubMed Central journal article supplement (PMC2715215; doi:10.1371/journal.ppat.1000542), 2009-08-07
Supplement: ppat.1000542.s004.pdf [file ppat.1000542.s004.pdf]

**Table S3. Interactions in AgPGRPLC2-MTP/TCT model structures***Hydrogen bonds*

| PGRPLC2 atoms |     | Atoms of MTP |                      | PGRPLC2 atoms |     | Atoms of TCT |                         |
|---------------|-----|--------------|----------------------|---------------|-----|--------------|-------------------------|
| H57           | Nε2 | AMU          | O7                   | H34           | Nε2 | GlcNAc       | O7                      |
| T149          | Oγ1 |              | O4 (W5) <sup>1</sup> | T149          | Oγ1 |              | O5 (W5) <sup>1</sup>    |
| T35           | O   |              | N2                   | V150          | N   |              | O3                      |
| Y68           | Oη  |              | O10                  | T35           | O   | MurNAc       | N2                      |
| K61           | Nζ  | L-Ala        | O (W74) <sup>1</sup> | H57           | Nε2 |              | O7                      |
| T90           | O   | D-isoGln     | N                    | K61           | Nζ  |              | O7 (W74) <sup>1</sup>   |
| D147          | Oδ2 |              | N2                   | Y68           | Oη  |              | O10                     |
| N95           | Nδ2 |              | Oε1                  | K61           |     | L-Ala        | O (W74) <sup>1</sup>    |
| N95           | Nδ2 | Lys          | O                    | T90           | O   | D-Glu        | N                       |
| G88           | O   |              | O (W22) <sup>1</sup> | D147          | Oδ2 |              | Oε2 (W190) <sup>1</sup> |
|               |     |              |                      | N95           | Nδ2 |              | Oδ                      |
|               |     |              |                      | R82           | Nη1 | Meso-DAP     | Oζ1                     |
|               |     |              |                      |               | Nη2 |              | Oζ2                     |
|               |     |              |                      | D64           | N   |              | Oζ2                     |
|               |     |              |                      | N95           | Nδ2 | D-Ala        | O                       |
|               |     |              |                      | G93           | N   |              | O                       |

*Hydrophobic contacts*

| PGRPLC2 residues |     | Atoms of MTP |    | PGRPLC2 residues |  | Atoms of TCT |    |
|------------------|-----|--------------|----|------------------|--|--------------|----|
| T35              |     | AMU          | C8 | A36              |  | GlcNAc       | C8 |
| H57              |     | L-Ala        | Cβ | H34              |  |              | C8 |
| Y63              |     | D-isoGln     | Cγ | V150             |  |              | C7 |
| P92              |     |              | Cβ | H57              |  | L-Ala        | Cβ |
|                  |     |              | C  | Y68              |  |              | Cβ |
| Y63              | Lys |              | Cα | T90              |  |              | Cβ |
|                  |     |              | Cγ | P92              |  | D-Glu        | Cε |
|                  |     |              | Cε |                  |  |              | Cβ |
| A89              |     |              | Cα |                  |  |              | Cγ |
|                  |     |              |    | Y63              |  |              | Cγ |
|                  |     |              |    | A89              |  |              | Cδ |
|                  |     |              |    | Y63              |  | Meso-DAP     | Cβ |
|                  |     |              |    | A89              |  |              | Cα |
|                  |     |              |    | P92              |  | D-Ala        | C  |

<sup>1</sup>Structural water molecules observed in *Dm*PGRP-LCx-TCT-LCa structure
