# Supplementary material for: Anopheles gambiae PGRPLC-Mediated Defense against Bacteria Modulates Infections with Malaria Parasites
Source: PubMed Central journal article supplement (PMC2715215; doi:10.1371/journal.ppat.1000542), 2009-08-07
Supplement: ppat.1000542.s005.pdf [file ppat.1000542.s005.pdf]

**Table S4. Interactions in AgPGRPLC3-MTP/TCT model structures***Hydrogen bonds*

| PGRPLC3 atoms |        | Atoms of MTP |                      | PGRPLC3 atoms |        | Atoms of TCT |                       |
|---------------|--------|--------------|----------------------|---------------|--------|--------------|-----------------------|
| H57           | Nε2    | AMU          | O7                   | H34           | Nε2    | GlcNAc       | O7                    |
| T35           | O      |              | N2                   | S152          | N      |              | O7                    |
| Y70           | Oη     |              | O10                  | E151          | N      |              | O3                    |
| R63           | Nε/Nη2 | L-Ala        | O (W74) <sup>1</sup> | T35           | O      | MurNAc       | N2                    |
| H92           | O      | D-isoGln     | N                    | H57           | Nε2    |              | O7                    |
| H144          | Nε2    |              | N2                   | R63           | Nε/Nη2 |              | O7 (W74) <sup>1</sup> |
| N97           | Nδ2    |              | Oε1                  | Y70           | Oη     |              | O10                   |
| N97           | Nδ2    | Lys          | O                    | R63           | Nη2    | L-Ala        | O (W74) <sup>1</sup>  |
| G90           | O      |              | O (W22) <sup>1</sup> | H92           | O      | D-Glu        | N                     |
|               |        |              |                      | H144          | Nε2    |              | Oε2                   |
|               |        |              |                      | N97           | Nδ2    |              | Oδ                    |
|               |        |              |                      | R84           | Nη1    | Meso-DAP     | Oζ1                   |
|               |        |              |                      |               | Nη2    |              | Oζ2                   |
|               |        |              |                      | S66           | N      |              | Oζ2                   |
|               |        |              |                      | N97           | Nδ2    | D-Ala        | O                     |
|               |        |              |                      | G95           | N      |              | O                     |

*Hydrophobic contacts*

| PGRPLC3 residues |  | Atoms of MTP |     | PGRPLC3 residues |  | Atoms of TCT |     |
|------------------|--|--------------|-----|------------------|--|--------------|-----|
| T35              |  | AMU          | C8  | A36              |  | GlcNAc       | C8  |
| S152             |  |              | C11 | H34              |  |              | C8  |
| F150             |  | D-isoGln     | C   | E151             |  |              | C8  |
| K94              |  |              | Cβ  |                  |  |              | C7  |
| A91              |  |              | Cδ  | F150             |  |              | C4  |
| A91              |  | Lys          | Cα  |                  |  |              | C5  |
| F65              |  |              | Cγ  |                  |  |              | C6  |
|                  |  |              | Cδ  | S152             |  | MurNAc       | C11 |
|                  |  |              |     | H57              |  | L-Ala        | Cβ  |
|                  |  |              |     | F150             |  | D-Glu        | Cε  |
|                  |  |              |     | H92              |  |              | Cβ  |
|                  |  |              |     | A91              |  |              | Cγ  |
|                  |  |              |     |                  |  |              | Cδ  |
|                  |  |              |     | F65              |  | Meso-DAP     | Cβ  |
|                  |  |              |     |                  |  |              | Cδ  |
|                  |  |              |     | A91              |  |              | Cα  |
|                  |  |              |     |                  |  |              | Cβ  |
|                  |  |              |     | S66              |  |              | Cζ  |
|                  |  |              |     | K94              |  | D-Ala        | Cα  |
|                  |  |              |     |                  |  |              | C   |

<sup>1</sup>Structural water molecules observed in *DmPGRP-LCx-TCT-LCa* structure
